# Supplementary material
Source: Springer Nature journal article supplement (https://www.springermedizin.de/resource/supplementary/12879_2012_2419_MOESM4_ESM.pdf/9444548)

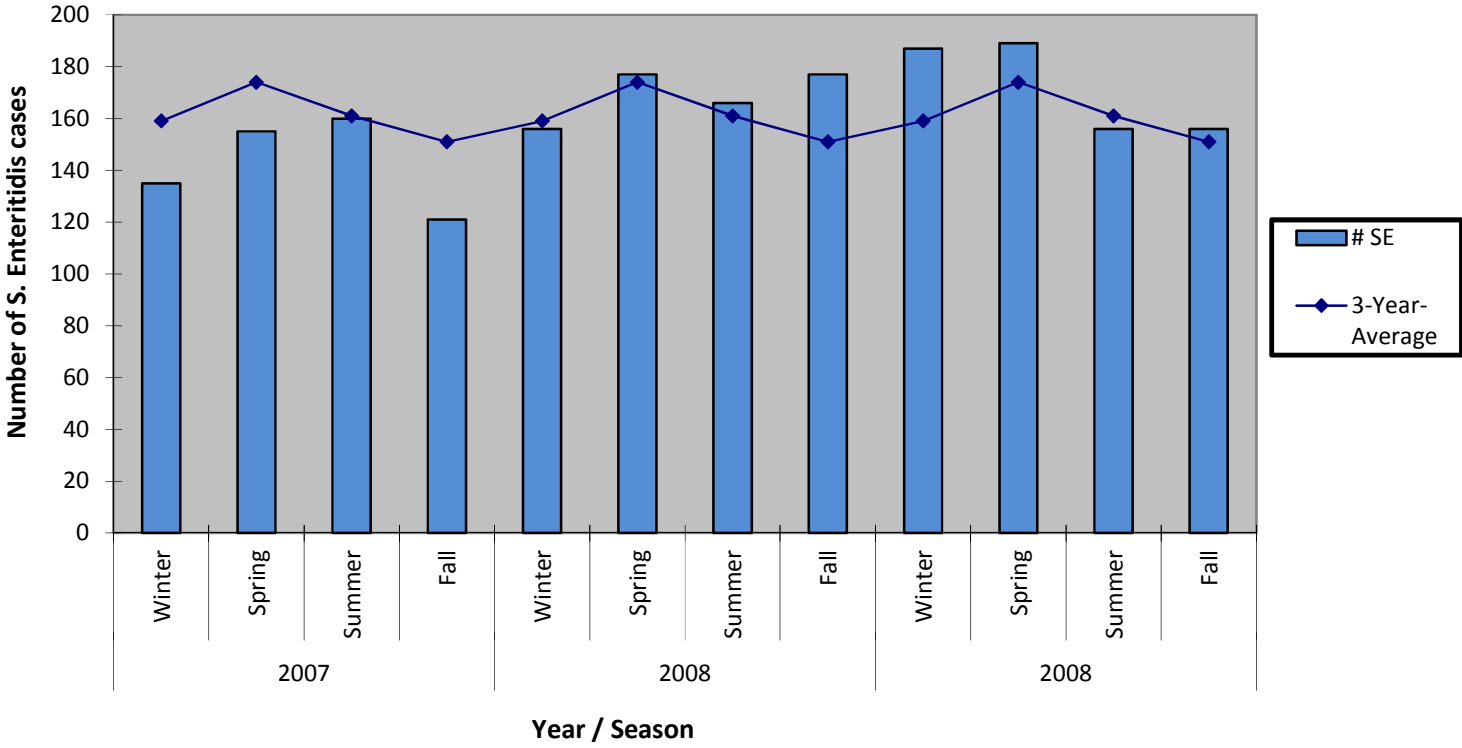

Supplement: MOESM4 [file 9444548]
